# Supplementary material
Source: PubMed Central journal article supplement (PMC4780550)

**Figure S2.** The curvilinear relationship [S10a] between  $P_{\text{mech}}$  and running speed,  $B$ , for a broad range of mammals and birds, reported by Heglund and colleagues [2] (dotted line), and the linear approximation given in eq. S11 (solid line).  $P_{\text{mech}}$  calculated for a 1 kg animal ( $M = 1$ ).

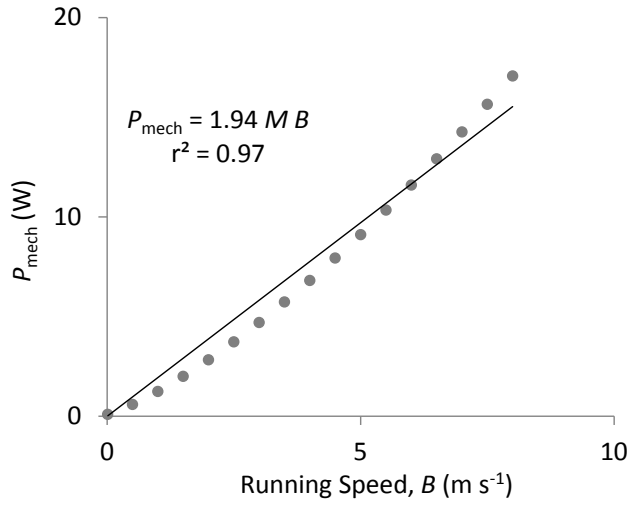

Supplement: rsbl20150935supp4.pdf [file rsbl20150935supp4.pdf]
